# Supplementary material
Source: PubMed Central journal article supplement (PMC548543)

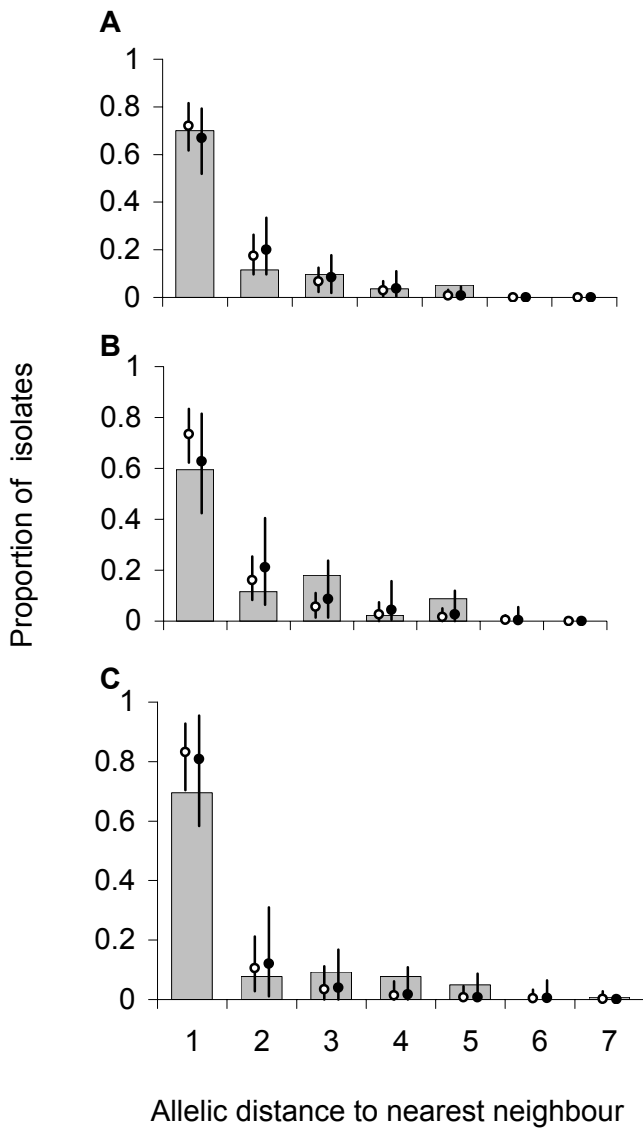

Supplement: pnas_102_6_1968__1.pdf [file pnas_102_6_1968__1.pdf]

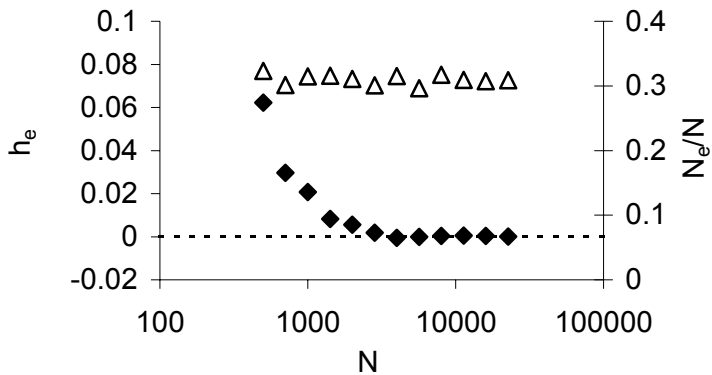

Supplement: pnas_102_6_1968__2.pdf [file pnas_102_6_1968__2.pdf]
